# Supplementary material
Source: Springer Nature journal article supplement (https://www.springermedizin.de/resource/supplementary/12889_2006_890_MOESM1_ESM.pdf/9502012)

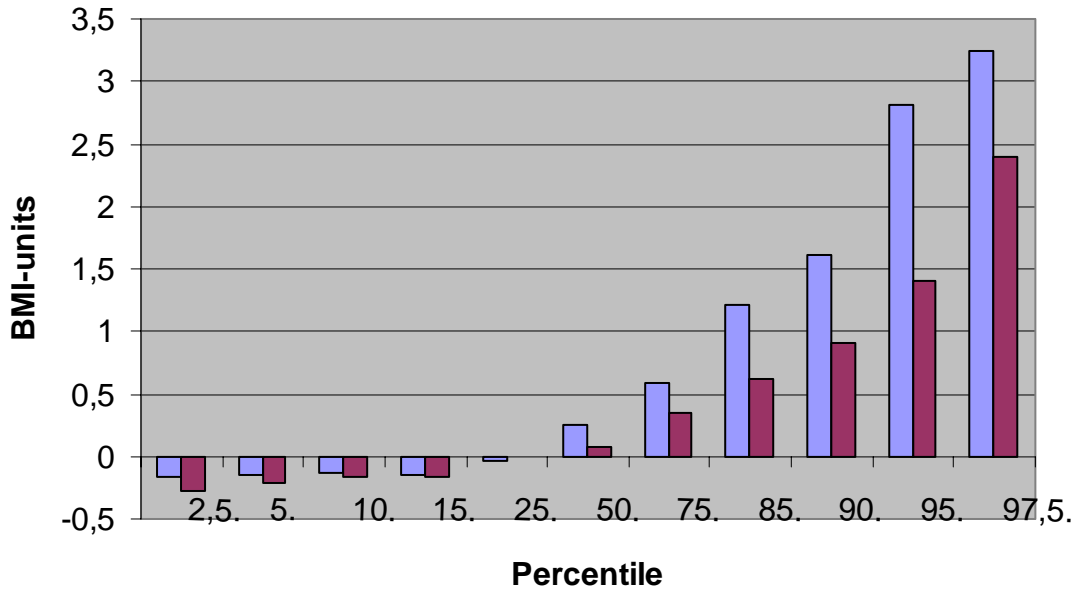

Supplement: MOESM1 [file 9502012]
